# Supplementary material for: Comparative Analysis of G-Layers in Bast Fiber and Xylem Cell Walls in Flax Using Raman Spectroscopy
Source: MDPI journal article supplement (doi:10.3390/biom13030435), 2023-02-24
Supplement: s1 [file s1]

**Table S1:** Peak assignment to chemical bonds and relative intensities in Raman average spectra. Assignment of peaks was done for xylem G-layer comparatively with control BF or control wood average spectra. Intensity of the peak is evaluated as follows: vw= very weak, w: weak, m: medium, s: strong, vs: very strong, trace: usually a shoulder or broad band with small intensity. Presence +, Absence  $\emptyset$ . XG: xyloglucan. GlcM: glucomannan. Dark grey colored-boxes highlight specificity.

| Peak<br>(cm <sup>-1</sup> ) | Peak in literature<br>(cm <sup>-1</sup> ) | assignment                                                                 | Putative<br>polymers         | G-layer<br>Tension side | G-layer<br>Opposite side | Bast<br>Fibers | Control<br>Wood | References      |
|-----------------------------|-------------------------------------------|----------------------------------------------------------------------------|------------------------------|-------------------------|--------------------------|----------------|-----------------|-----------------|
| 380                         | 377–379–380–382                           | $\delta$ (CCC), symmetric<br>ring deformation                              | Cellulose                    | +(s)                    | +(s)                     | +(s)           | +(w)            | [22]-[25]       |
| 405                         |                                           |                                                                            | Cellulose                    | +(vw)                   | +(vw)                    | +(vw)          | +(vw)           | [22]            |
| 435                         | 434–435–437                               | $\delta$ (COC), $\delta$ (CCC), ring<br>deformation                        | Cellulose                    | +(m)                    | +(m)                     | +(m)           | +(vw)           | [22]-[24]       |
| 462                         |                                           | $\delta$ (COC), $\delta$ (CCC), ring<br>deformation, xylan                 | Xylan                        | +(m)                    | +(m)                     | +(m)           | +(vw)           | [24]            |
| 490                         | 489–490–492–496                           | $\delta$ (COC), glycosidic<br>linkage, xylan                               | Xylan                        | +(m)                    | +(m)                     | +(m)           | +(vw)           | [23]-[24]       |
| 517                         | 517–518–519–521                           | $\delta$ (COC), glycosidic<br>linkage/CCC ring<br>deformation              | Xylan, XG                    | +(s)                    | +(s)                     | +(s)           | +(vw)           | [22]-[25]       |
| 562                         | 565–567–575                               | $\delta$ (COC), ring<br>pyranose                                           | Cellulose<br>Xylan           | +(w)                    | +(w)                     | +(w)           | +(vw)           | [24]            |
| 607                         | 602–607–609–611                           | $\delta$ (CCH)                                                             | Cellulose                    | +(vw)                   | +(vw)                    | $\emptyset$    | $\emptyset$     | [24]            |
| 650                         |                                           | $\delta$ O-H out of plane<br>bending mode                                  | Crystalline<br>cellulose     | +(vw)                   | +(vw)                    | $\emptyset$    | $\emptyset$     | [22]-[24]       |
| 900                         | 893–900–914                               | $\delta$ (HCC), $\delta$ (HCO)<br>cluster of peaks-<br>methine bending     | Cellulose                    | +(m)                    | +(m)                     | +(m)           | +(vw)           | [22]-[24]       |
| 969                         | 966–968–971–974                           | $\rho$ (CH <sub>2</sub> ) skeletal                                         | $\beta$ -glucan              | +(m)                    | +(m)                     | +(m)           | +(vw)           | [22]-[24]       |
| 990                         | 993–995–997–999                           | $\rho$ (CH <sub>2</sub> )                                                  | Arabinose                    | +(w)                    | +(w)                     | +(vw)          | +(vw)           | [22]-[24]       |
| 1,094                       | 1,091-1,092-1,095-1,096                   | xyloglucan $\beta$ (1-4)<br>linked glucose                                 | Cellulose<br>xylan, XG, GlcM | +(s)                    | +(s)                     | +(s)           | +(m)            | [17], [22]-[26] |
| 1,126                       | 1,118–1,121                               | $\nu$ (COC) symmetric,<br>glycosidic ring<br>breathing                     | Xylan<br>Cellulose           | +(s)                    | +(s)                     | +(s)           | +(vw)           | [17],[23],[27]  |
| 1,150                       | 1,147–1,150–1,152–1,154                   | $\nu$ (CC), $\nu$ (CO)<br>asymmetric, ring<br>breathing<br>(glucopyranose) | Cellulose                    | +(s)                    | +(s)                     | +(s)           | +(m)            | [17],[23],[24]  |
| 1,203                       | 1,200-1,202                               | Lignin methoxy<br>vibrations                                               | Lignin                       | +(vw)                   | +(vw)                    | +(vw)          | +(vw)           | [28]            |

|       |                   |                                                                  |                                                     |       |       |       |          |                |
|-------|-------------------|------------------------------------------------------------------|-----------------------------------------------------|-------|-------|-------|----------|----------------|
| 1,270 | 1,272             | Aryl-O stretching of aryl-OH and aryl-O-CH <sub>3</sub> (G unit) | a1: G-unit lignin                                   | +(m)  | +(m)  | ø     | +(m)     | [22],[28]      |
| 1,295 | 1,292–1,293–1,294 | δ(CH <sub>2</sub> ) twisting long chain                          | Aromatics, Lignin                                   | +(w)  | +(w)  | trace | +(m)     | [22],[24],[29] |
| 1,334 | 1,331-1,332       | OH in plane bending                                              | Cellulose                                           | +(m)  | +(m)  | +(m)  | +(m)     | [17],          |
| 1,376 | 1,378–1,379–1,380 | δ(CH <sub>2</sub> )                                              | Cellulose                                           | +(s)  | +(s)  | +(s)  | +(s)     |                |
| 1,421 |                   | Lignin methoxy deformation                                       | a2: aromatics                                       | +(vw) | +(vw) | ø     | +(m)     | [22]-[25]      |
| 1,452 | 1,453–1,455       | δ(CH <sub>2</sub> ) symmetric bending on pyranose ring           | Hemicelluloses<br>Amorphous cellulose, pectin       | +(w)  | +(w)  | +(w)  | +(m)     | [22],[26],[27] |
| 1,480 | 1,478             | δ(CH <sub>2</sub> ) scissors                                     | Cellulose                                           | +(vw) | +(vw) | +(vw) | +(m)     | [22],[24]      |
| 1,599 | 1,593–1,601       | ν(C=C), aromatics                                                | a3: coniferyl aldehyde<br>Lignin                    | ++(s) | ++(s) | trace | +++ (vs) | [23],[27]      |
| 1,658 | 1,657–1,660       | δ(CC), C=O coniferyl aldehyde, C=C coniferyl alcohol             | a4: coniferyl alcohol, coniferyl aldehyde<br>Lignin | ++(s) | ++(s) | trace | +++ (vs) | [17]           |
| 1,729 | 1,725-1,732       | C=O of acetyl or carboxylic acid group                           | Hemicelluloses                                      | +(w)  | +(w)  | trace | +(w)     | [17],[27]      |
